# Supplementary material for: Systematic Analysis of the Grafting-Related Glucanase-Encoding GH9 Family Genes in Pepper, Tomato and Tobacco
Source: MDPI journal article supplement (doi:10.3390/plants11162092), 2022-08-11
Supplement: s1 [file s1]

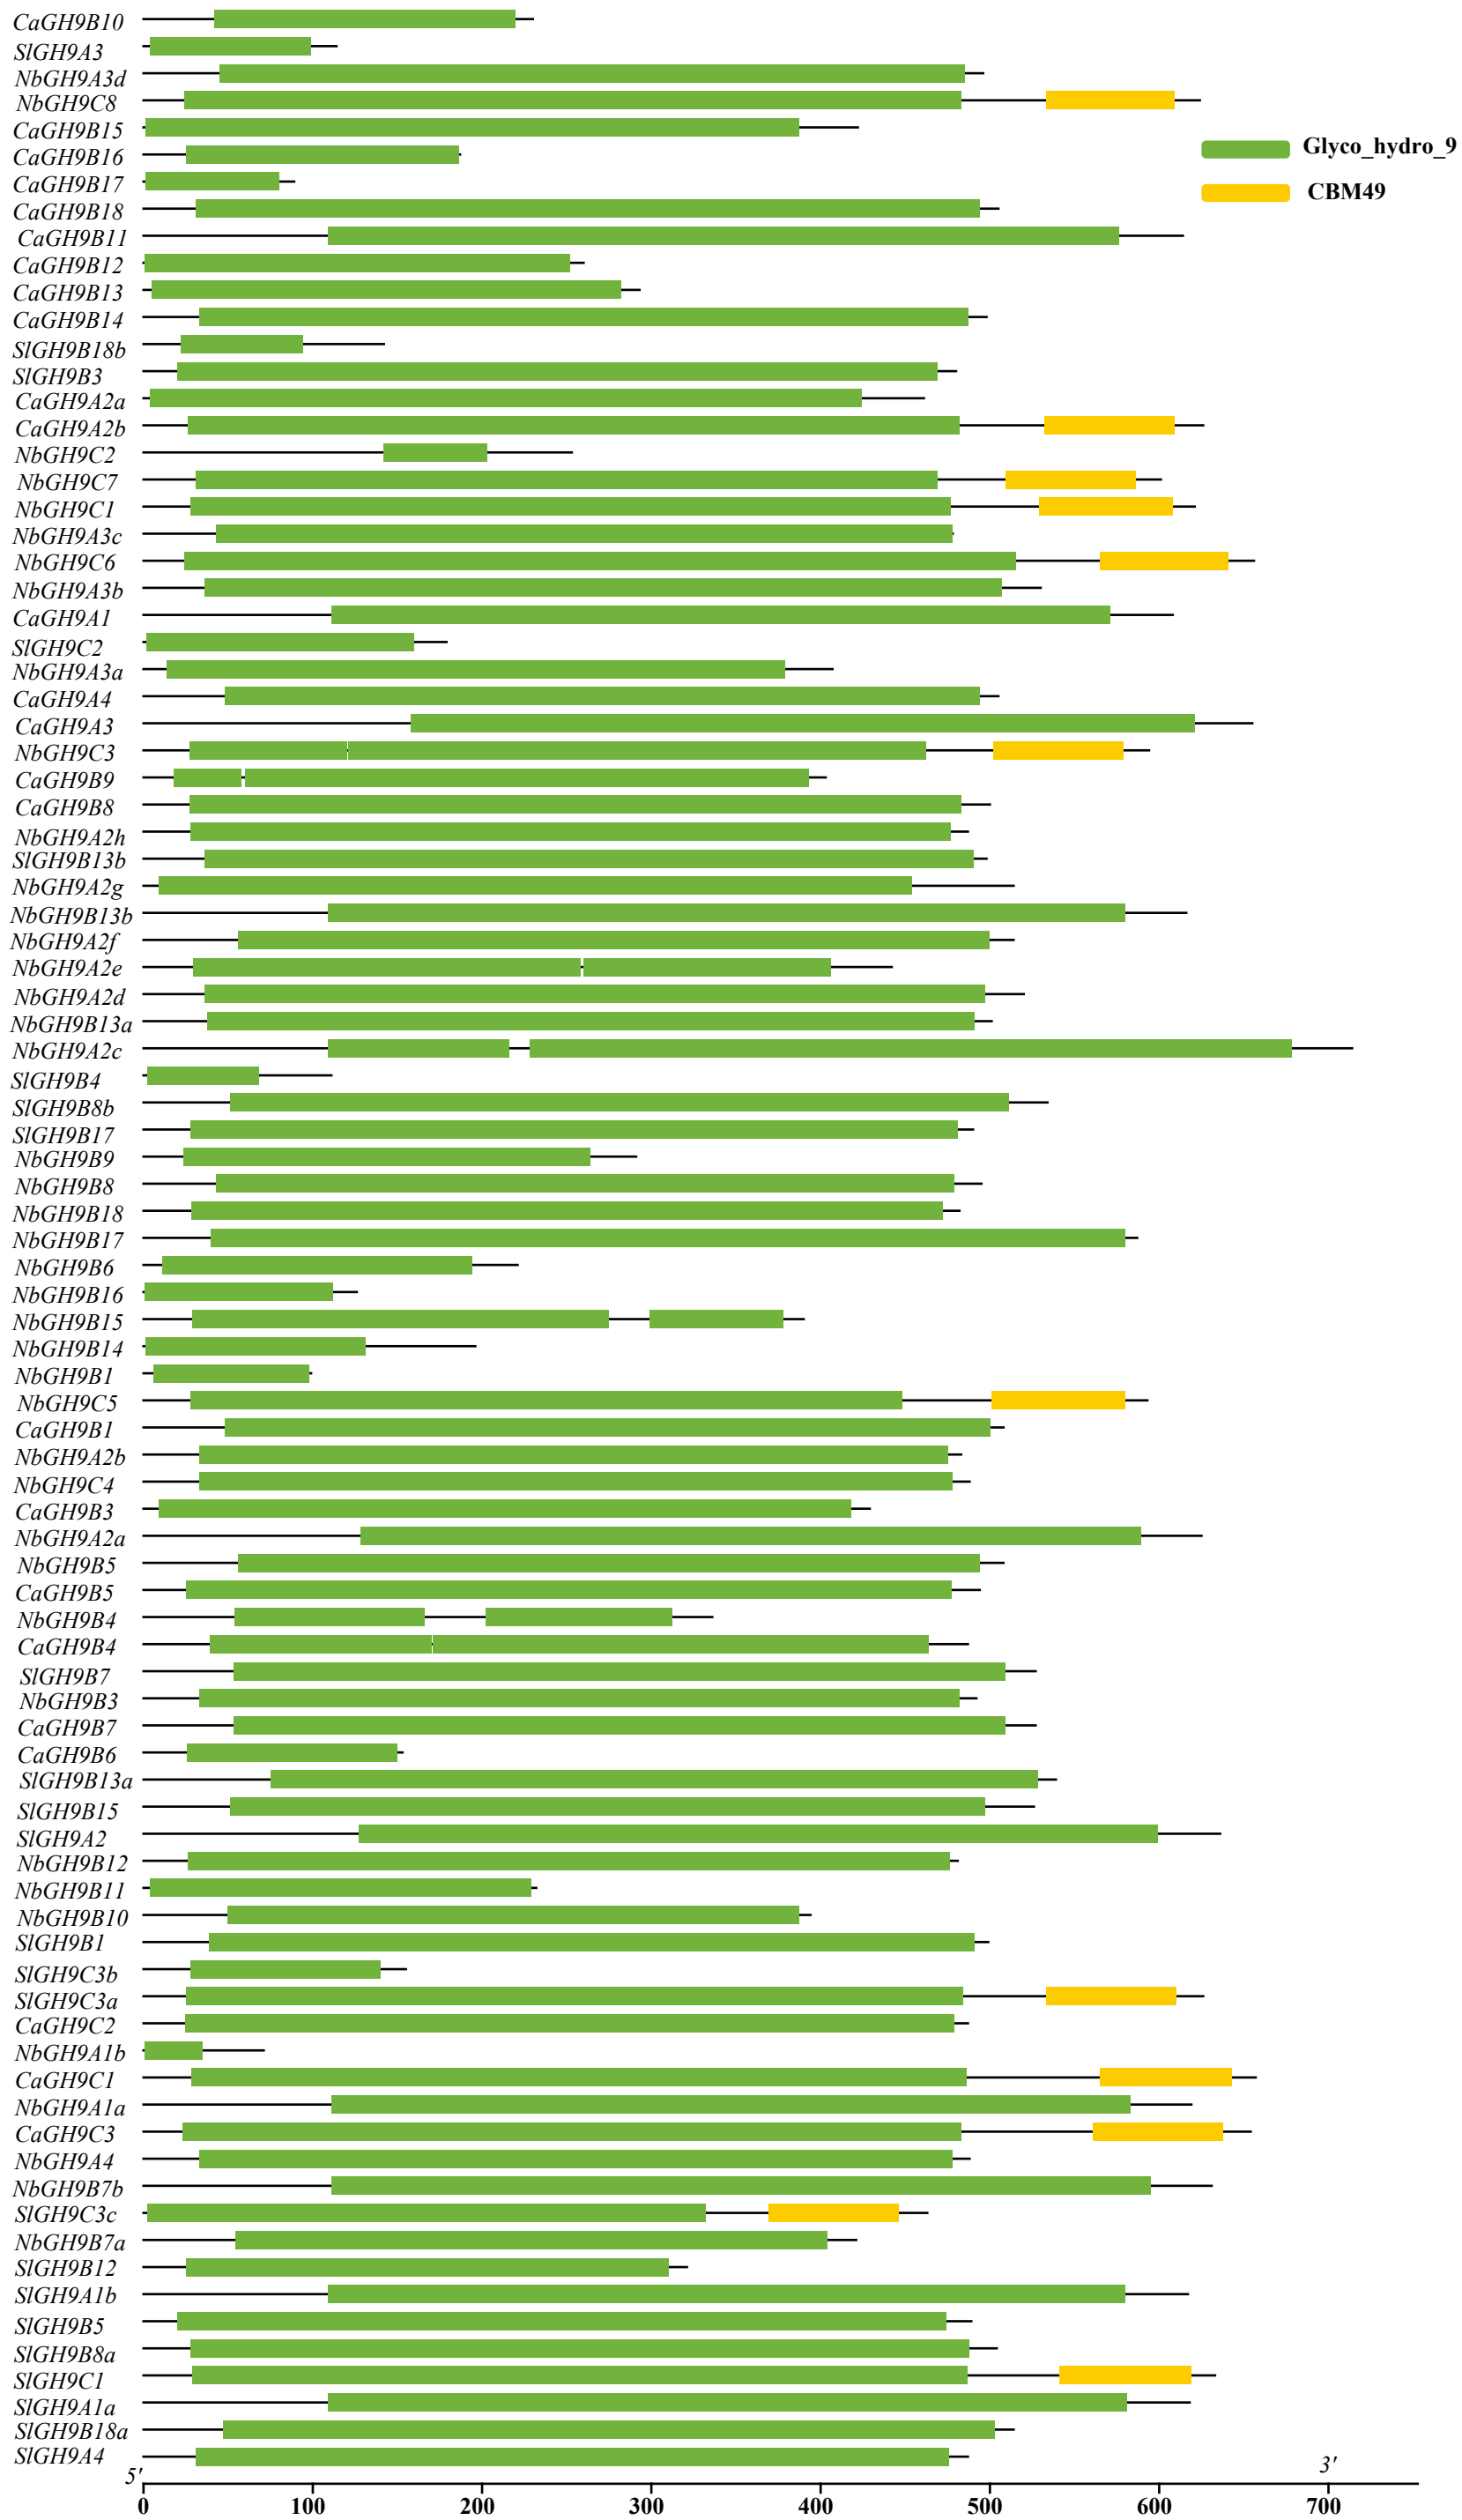

**Figure S1. Protein domains of CaGH9, SlGH9 and NbGH9 family members.**  
Green and yellow block represents the Glyco\_hydro\_9 and CBM49 domain, respectively.
