# Supplementary figures and images for: Systematic Analysis of the Grafting-Related Glucanase-Encoding GH9 Family Genes in Pepper, Tomato and Tobacco
Source: MDPI journal article supplement (doi:10.3390/plants11162092), 2022-08-11

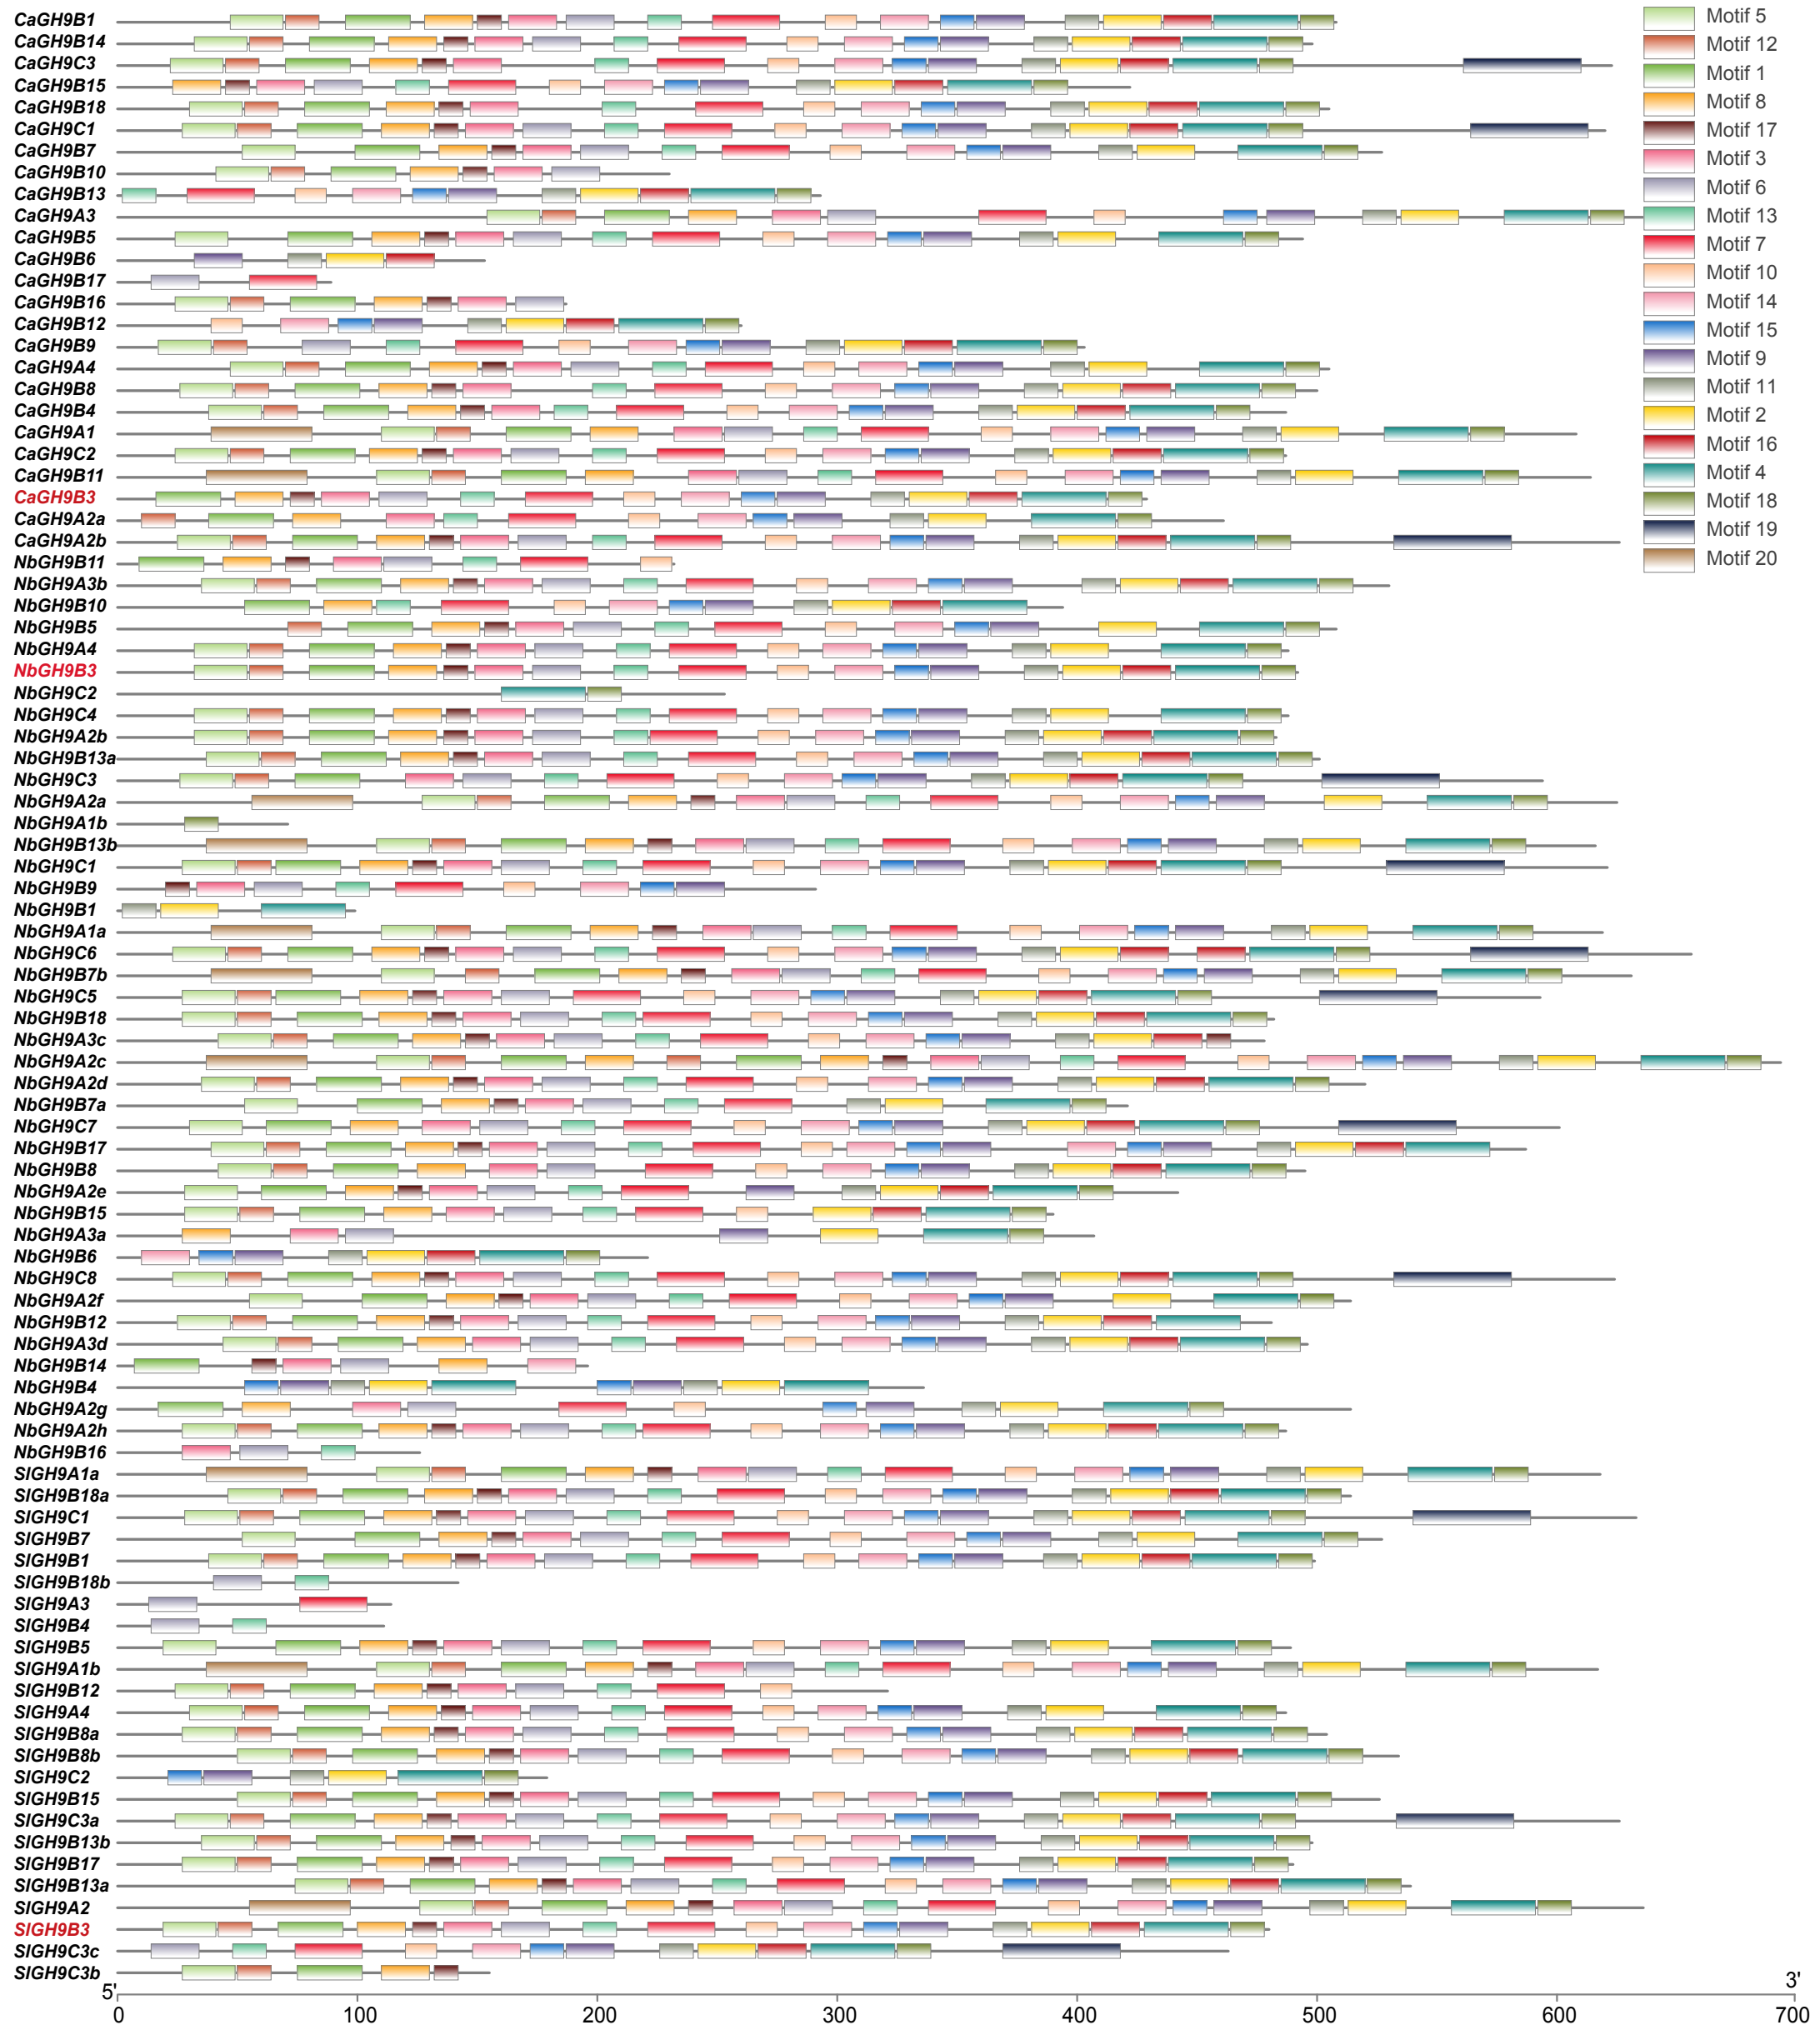

Supplement: s1 [file s1]
